# Supplementary material
Source: Springer Nature journal article supplement (https://www.springermedizin.de/resource/supplementary/12913_2011_1883_MOESM2_ESM.pdf/9529162)

## PCO2 at arrival with Serious Evolution

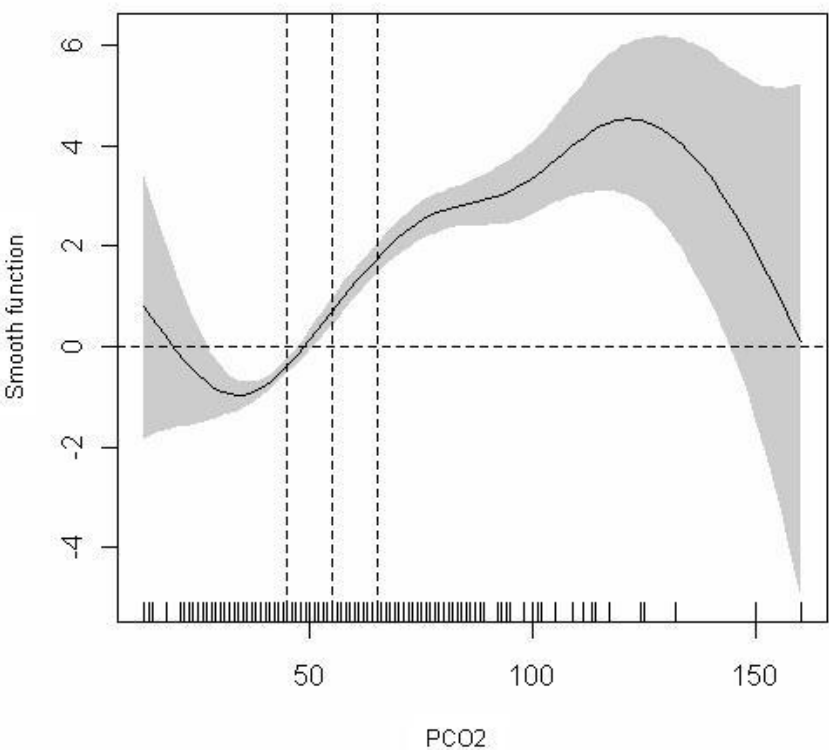

## PCO2 at time of decision with Serious Evolution

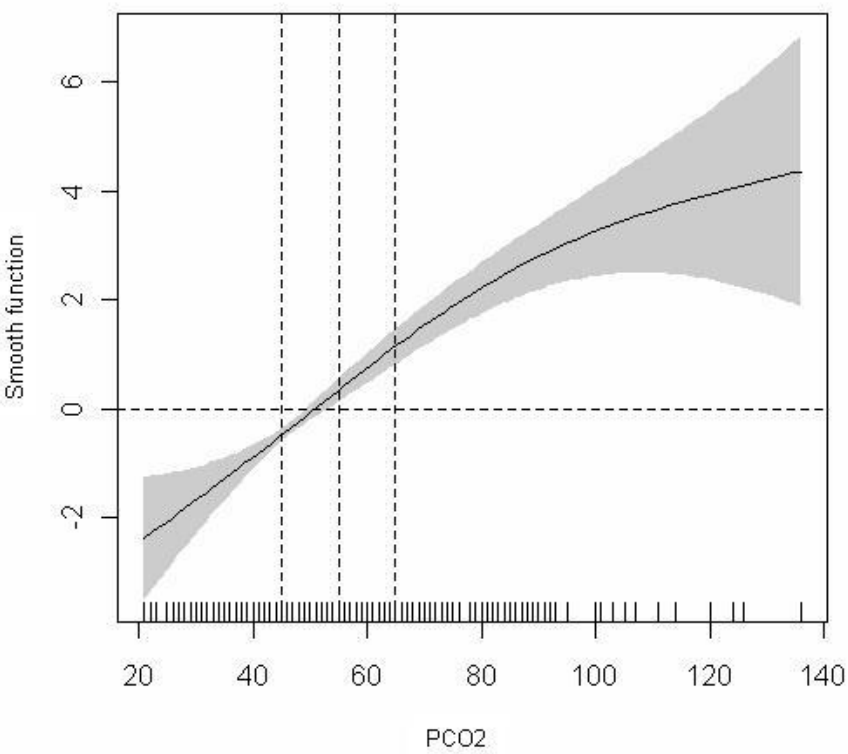

Supplement: MOESM2 [file 9529162]
